# Supplementary material for: Distinctive C–N cleavage/C–C formation mechanism in Au-catalyzed reactions of N-(o-alkynylphenyl)imines and vinyldiazo ketones
Source: Royal Society of Chemistry journal article supplement (doi:10.1039/d4cy01191k), 2024-12-23
Supplement: d4cy01191k2.pdf [file d4cy01191k2.pdf]

## Supplementary Information

### **Distinctive C–N Cleavage/C–C Formation Mechanism in Au-Catalyzed Reactions of N-(*o*-Alkynylphenyl)imines and Vinyldiazo Ketones**

Yuxia Liu,<sup>\*a</sup> Jing Zhang,<sup>a</sup> Qingqing Qu,<sup>a</sup> Xinhui Cao,<sup>a</sup> Lingjun Liu<sup>\*b</sup> and Guang Chen<sup>\*a</sup>

---

<sup>a</sup> Shaanxi Key Laboratory of Chemical Additives for Industry, College of Chemistry and Chemical Engineering, Shaanxi University of Science and Technology, Xi'an 710021, China. E-mail: liuyuxia2008@163.com

<sup>b</sup> School of Chemistry and Chemical Engineering, Qufu Normal University, Qufu, 273165, P. R. China

† Electronic supplementary information (ESI) available: Additional computational results and Cartesian coordinates of all optimized structures located in this work (PDF).

## Contents

|                 |         |
|-----------------|---------|
| ○ Fig. S1.....  | S3      |
| ○ Fig. S2.....  | S4      |
| ○ Fig. S3.....  | S5      |
| ○ Fig. S4.....  | S6      |
| ○ Fig. S5.....  | S7      |
| ○ Fig. S6.....  | S8      |
| ○ Fig. S7.....  | S9      |
| ○ Table S1..... | S10-S13 |

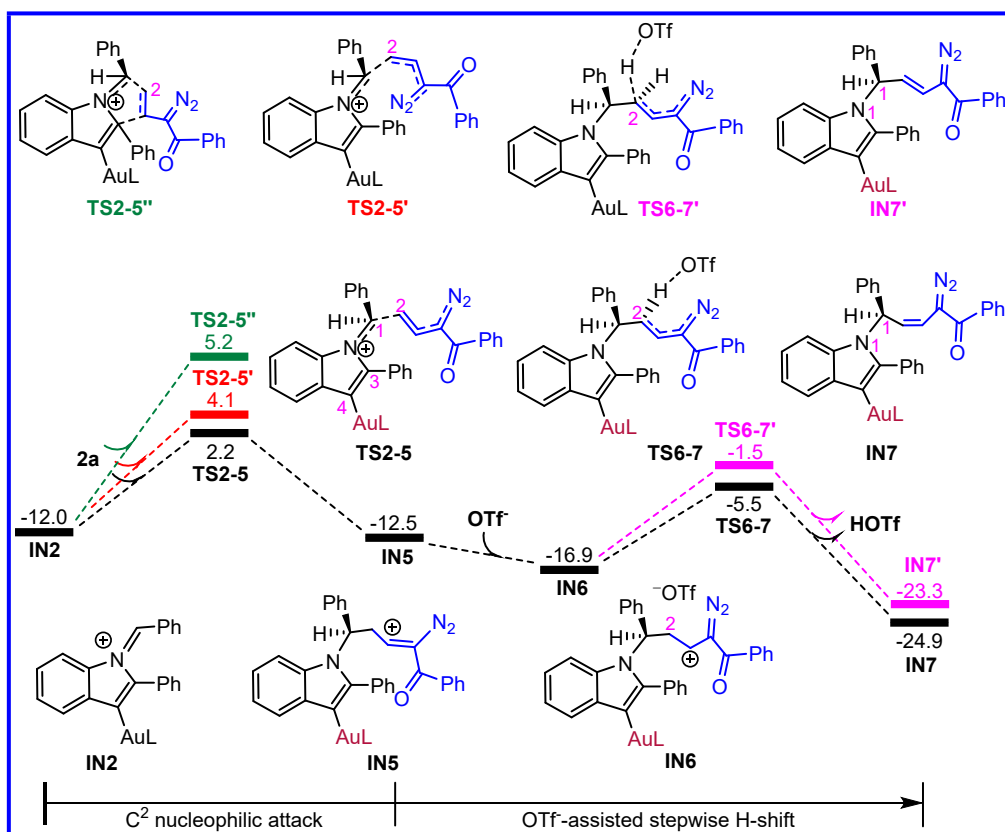

**Fig. S1** Calculated free energy profiles in DCE solvent along other possible pathways from IN2. The relative free energies are given in kcal mol<sup>-1</sup>. L=PPh<sub>3</sub>

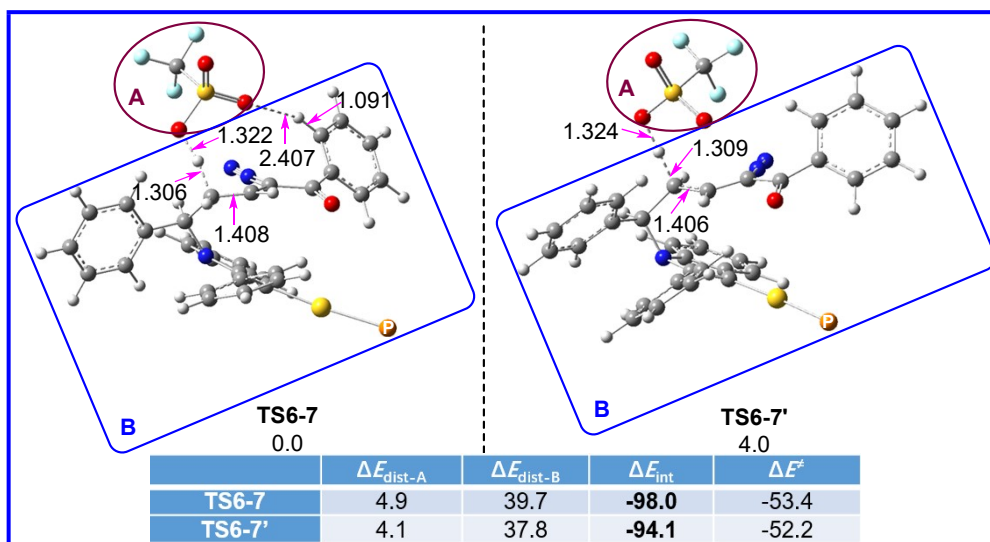

**Fig. S2** Distortion/interaction analyses for **TS6-7** and **TS6-7'** in Fig. S1. The phenyl groups attached to P atom are omitted for clarity. The free energies and bond distances are given in kcal mol<sup>-1</sup> and Å, respectively.

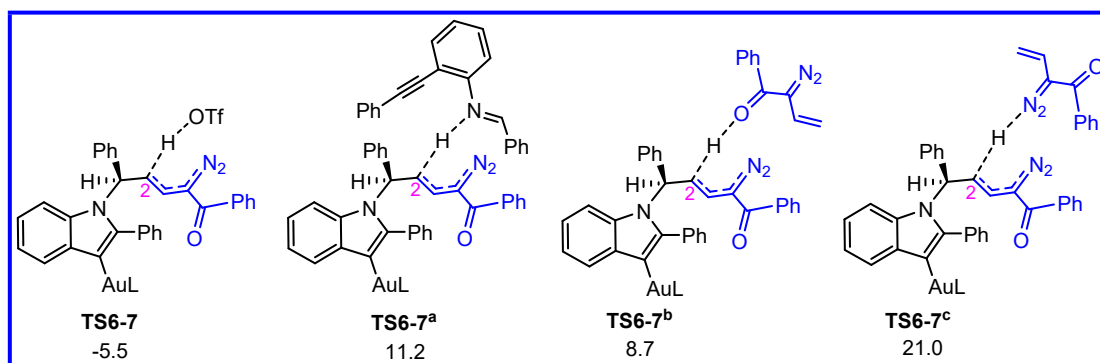

**Fig. S3** Other possible H-shift transition states from **IN6**. The relative free energies are given in kcal mol<sup>-1</sup>. L=PPh<sub>3</sub>

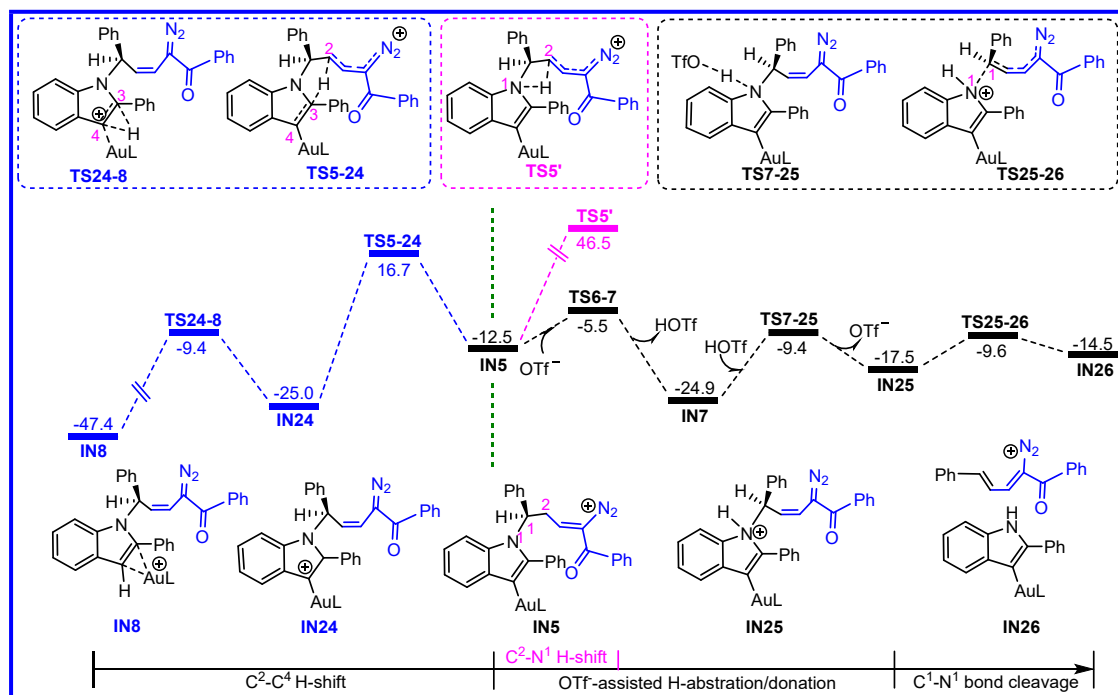

**Fig. S4** Calculated free energy profile in DCE solvent for other possible H-shift pathways starting from **IN5**. The relative free energies are given in kcal mol<sup>-1</sup>. L=PPh<sub>3</sub>

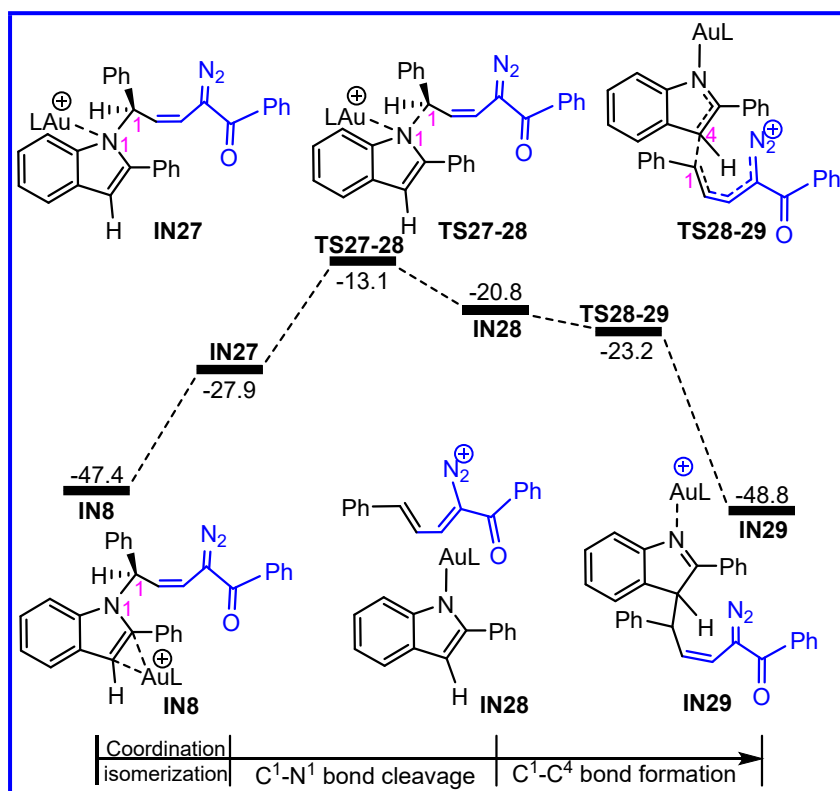

**Fig. S5** Calculated free energy profile in DCE solvent for other possible C<sup>1</sup>-N<sup>1</sup> cleavage pathway from IN8. The relative free energies are given in kcal mol<sup>-1</sup>. L=PPh<sub>3</sub>

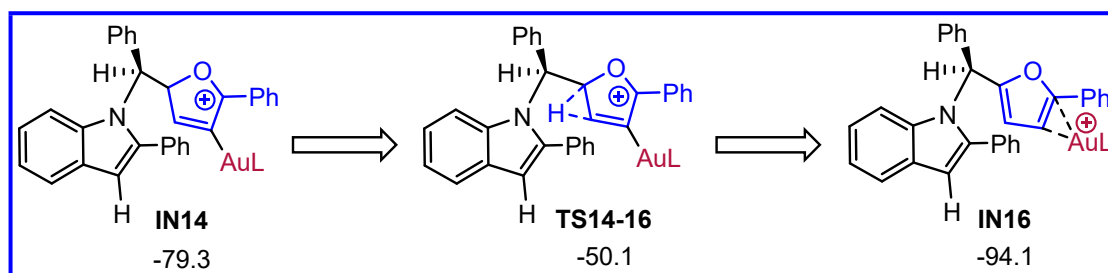

**Fig. S6** Calculated direct 1,2-H-shift pathway in DCE solvent from **IN14**. The relative free energies are given in kcal mol<sup>-1</sup>. L=PPh<sub>3</sub>



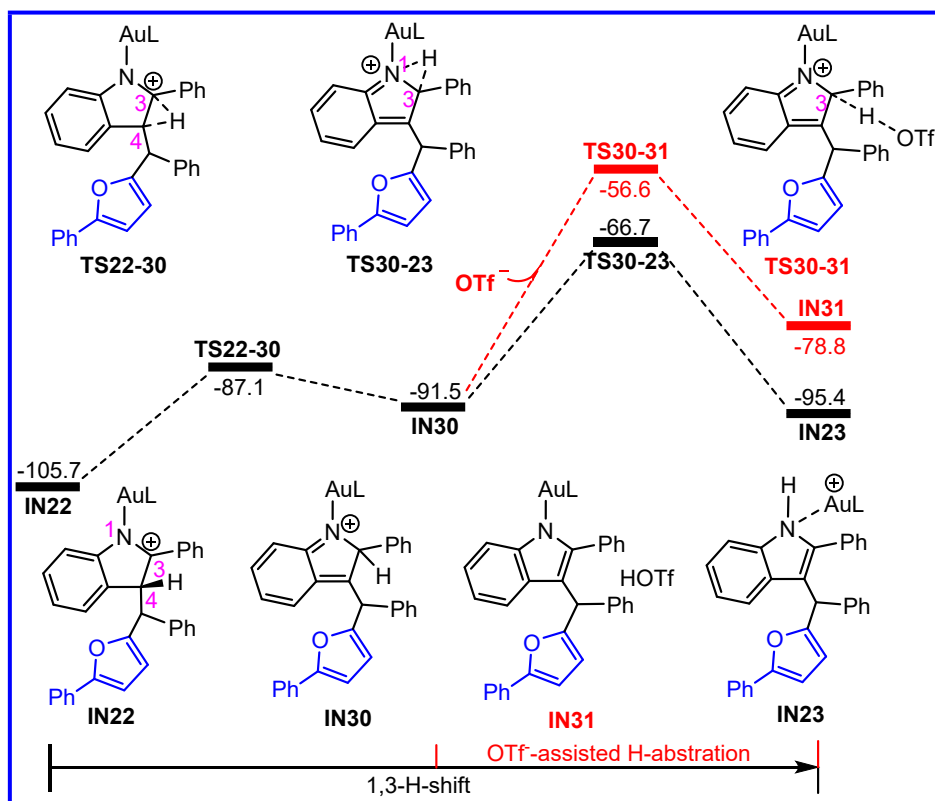

**Fig. S7** Calculated free energy profile in DCE solvent for other possible pathways from **IN22**. The relative free energies are given in kcal mol<sup>-1</sup>. L=PPh<sub>3</sub>

**Table S1.** Calculated Gibbs free energies in the gas-phase using M06 functional, single-point HF energies in DCE solvent using M06 functional, and imaginary frequencies for all structures in the present work. The relative energies and the imaginary frequencies are given in Hartree and  $\text{cm}^{-1}$ , respectively.

| Structure                     | Gibbs Free Energy<br>(M06 gas-phase<br>optimized calculation) | Solvation HF Energy<br>(M06 single-point<br>calculation) | Imaginary Frequency |
|-------------------------------|---------------------------------------------------------------|----------------------------------------------------------|---------------------|
| <b>[LAu(DCE)]<sup>+</sup></b> | -2169.904494                                                  | -2170.49362480                                           |                     |
| <b>AuL<sup>+</sup></b>        | -1171.024051                                                  | -1171.4980612                                            |                     |
| <b>1</b>                      | -863.043478                                                   | -863.51966134                                            |                     |
| <b>IN1</b>                    | -2034.121943                                                  | -2035.05566396                                           |                     |
| <b>TS1-2</b>                  | -2034.118460                                                  | -2035.04800838                                           | -211.40             |
| <b>IN2</b>                    | -2034.144204                                                  | -2035.07993738                                           |                     |
| <b>2</b>                      | -570.014299                                                   | -570.29042518                                            |                     |
| <b>IN3</b>                    | -1741.075537                                                  | -1741.81794134                                           |                     |
| <b>TS3-4</b>                  | -1741.061068                                                  | -1741.80270127                                           | -456.03             |
| <b>IN4</b>                    | -1631.634470                                                  | -1632.34313470                                           |                     |
| <b>IN5</b>                    | -2604.158471                                                  | -2605.39497016                                           |                     |
| <b>IN6</b>                    | -3565.380766                                                  | -3566.74779574                                           |                     |
| <b>TS6-7</b>                  | -3565.368877                                                  | -3566.72668485                                           | -1606.70            |
| <b>IN7</b>                    | -2603.784162                                                  | -2604.97549152                                           |                     |
| <b>TS7-8</b>                  | -3565.404591                                                  | -3566.95844672                                           | -1062.88            |
| <b>IN8</b>                    | -2604.206597                                                  | -2605.43965179                                           |                     |

|                |              |                |          |
|----------------|--------------|----------------|----------|
| <b>TS8-9</b>   | -2604.173113 | -2605.40479735 | -147.75  |
| <b>IN9</b>     | -2604.175038 | -2605.40834373 |          |
| <b>TS9-10</b>  | -2604.154344 | -2605.38726851 | -191.26  |
| <b>IN10</b>    | -2604.181805 | -2605.41770415 |          |
| <b>IN11</b>    | -2604.189529 | -2605.42397216 |          |
| <b>TS11-12</b> | -2604.176082 | -2605.40786596 | -464.10  |
| <b>IN12</b>    | -2494.755520 | -2495.94975043 |          |
| <b>TS12-13</b> | -2494.739379 | -2495.93332160 | -58.66   |
| <b>IN13</b>    | -2494.738353 | -2495.93336448 |          |
| <b>TS13-14</b> | -2494.728822 | -2495.92504403 | -277.91  |
| <b>IN14</b>    | -2494.791973 | -2495.98696294 |          |
| <b>TS14-15</b> | -3455.994171 | -3457.51168190 | -1592.00 |
| <b>IN15</b>    | -2494.403646 | -2495.55656403 |          |
| <b>TS15-16</b> | -3456.019652 | -3457.53538870 | -1263.40 |
| <b>IN16</b>    | -2494.811572 | -2496.01223636 |          |
| <b>IN17</b>    | -2494.829348 | -2496.02588061 |          |
| <b>TS17-18</b> | -2494.791716 | -2495.98607584 | -179.72  |
| <b>IN18</b>    | -2494.792631 | -2495.98354475 |          |
| <b>TS18-19</b> | -2494.780661 | -2495.96764391 | -181.32  |
| <b>IN19</b>    | -2494.807333 | -2496.00627374 |          |
| <b>IN20</b>    | -2494.809835 | -2496.00970561 |          |
| <b>TS20-21</b> | -2494.796037 | -2495.99275791 | -294.53  |

|                          |              |                |          |
|--------------------------|--------------|----------------|----------|
| <b>IN21</b>              | -2494.810760 | -2496.00593402 |          |
| <b>TS21-22</b>           | -2494.805487 | -2496.00051100 | -22.40   |
| <b>IN22</b>              | -2494.828696 | -2496.02585881 |          |
| <b>TS22-23</b>           | -2571.149621 | -2572.40344267 | -271.71  |
| <b>IN23</b>              | -2494.810837 | -2496.01623111 |          |
| <b>P</b>                 | -1323.746625 | -1324.48525759 |          |
| <b>TS2-5''</b>           | -2604.142020 | -2605.36987919 | -410.46  |
| <b>TS2-5'</b>            | -2604.141585 | -2605.37387808 | -414.40  |
| <b>TS6-7'</b>            | -3565.361449 | -3566.72580764 | -1536.51 |
| <b>IN7'</b>              | -2603.778068 | -2604.96847862 |          |
| <b>TS6-7<sup>a</sup></b> | -3467.178861 | -3468.90954359 | -1032.56 |
| <b>TS6-7<sup>b</sup></b> | -3174.149734 | -3175.67543339 | -845.26  |
| <b>TS6-7<sup>c</sup></b> | -3174.123099 | -3175.65723119 | -133.30  |
| <b>TS5-24</b>            | -2604.111680 | -2605.34191210 | -953.79  |
| <b>IN24</b>              | -2604.168195 | -2605.39943451 |          |
| <b>TS24-8</b>            | -2604.149347 | -2605.37644586 | -885.37  |
| <b>TS5'</b>              | -2604.059315 | -2605.2865983  | -1644.92 |
| <b>TS7-25</b>            | -3565.373920 | -3566.94405887 | -31.01   |
| <b>IN25</b>              | -2604.149808 | -2605.38548864 |          |
| <b>TS25-26</b>           | -2604.148309 | -2605.38076344 | -310.45  |
| <b>IN26</b>              | -2604.158483 | -2605.39520425 |          |

|                |              |                |          |
|----------------|--------------|----------------|----------|
| <b>IN27</b>    | -2604.182400 | -2605.42199745 |          |
| <b>TS27-28</b> | -2604.167931 | -2605.40606828 | -255.03  |
| <b>IN28</b>    | -2604.177814 | -2605.41722130 |          |
| <b>TS28-29</b> | -2604.185154 | -2605.41759739 | -259.21  |
| <b>IN29</b>    | -2604.203658 | -2605.44265811 |          |
| <b>TS14-16</b> | -2494.742600 | -2495.93714313 | -1093.15 |
| <b>TS22-30</b> | -2494.781782 | -2495.97582708 | -1021.55 |
| <b>IN30</b>    | -2494.804848 | -2495.99886308 |          |
| <b>TS30-31</b> | -3456.226394 | -3457.55267418 | -1389.45 |
| <b>IN31</b>    | -3456.028566 | -3457.55138584 |          |
| <b>TS30-23</b> | -2494.758711 | -2495.95295649 | -1480.36 |
